# Supplementary material
Source: PubMed Central journal article supplement (PMC5184398)

# Number of Papers Published by Year

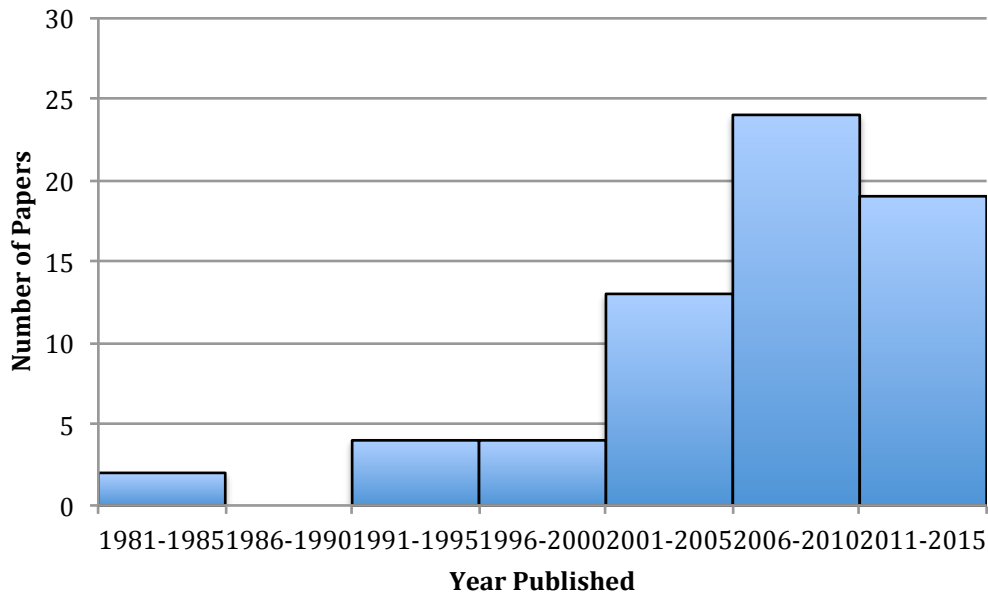

Supplement: NIHMS834745-supplement-Figure_S1.pdf [file NIHMS834745-supplement-Figure_S1.pdf]
